# Supplementary material for: Detection of IFNγ-Secreting CD4+ and CD8+ Memory T Cells in COVID-19 Convalescents after Stimulation of Peripheral Blood Mononuclear Cells with Live SARS-CoV-2
Source: MDPI journal article supplement (doi:10.3390/v13081490), 2021-07-29
Supplement: s1 [file s1]

# Supplementary materials

Table S1. Demographic characteristics of the study subjects.

| Group | Time from Disease Onset, Months | n  | Age, Years<br>Mean (Range) | Sex           |             | Chronic Diseases, n (%) | Disease Severity |                           |
|-------|---------------------------------|----|----------------------------|---------------|-------------|-------------------------|------------------|---------------------------|
|       |                                 |    |                            | Female, n (%) | Male, n (%) |                         | Mild, n (%)      | Moderate to Severe, n (%) |
| 1     | 1                               | 7  | 42 (24–61)                 | 5 (71.4)      | 2 (28.6)    | 0 (0.0)                 | 7 (100)          | 0 (0)                     |
| 2     | 2-3                             | 9  | 43.9 (32–77)               | 6 (66.7)      | 3 (33.3)    | 1 (11.1) <sup>†</sup>   | 6 (66.7)         | 3 (33.3)                  |
| 3     | 4-6                             | 21 | 40.5 (25–61)               | 13 (61.9)     | 8 (38.1)    | 2 (9.5) <sup>#</sup>    | 15 (71.4)        | 6 (28.6)                  |
| Naïve | n/a                             | 15 | 35.9 (21-68)               | 9 (60.0)      | 6 (40.0)    | 1 (6.7) <sup>‡</sup>    | n/a              | n/a                       |

<sup>†</sup> atopic dermatitis; <sup>#</sup> chronic bronchitis and Hashimoto's thyroiditis; <sup>‡</sup> hypertonic disease; n/a: not applicable.

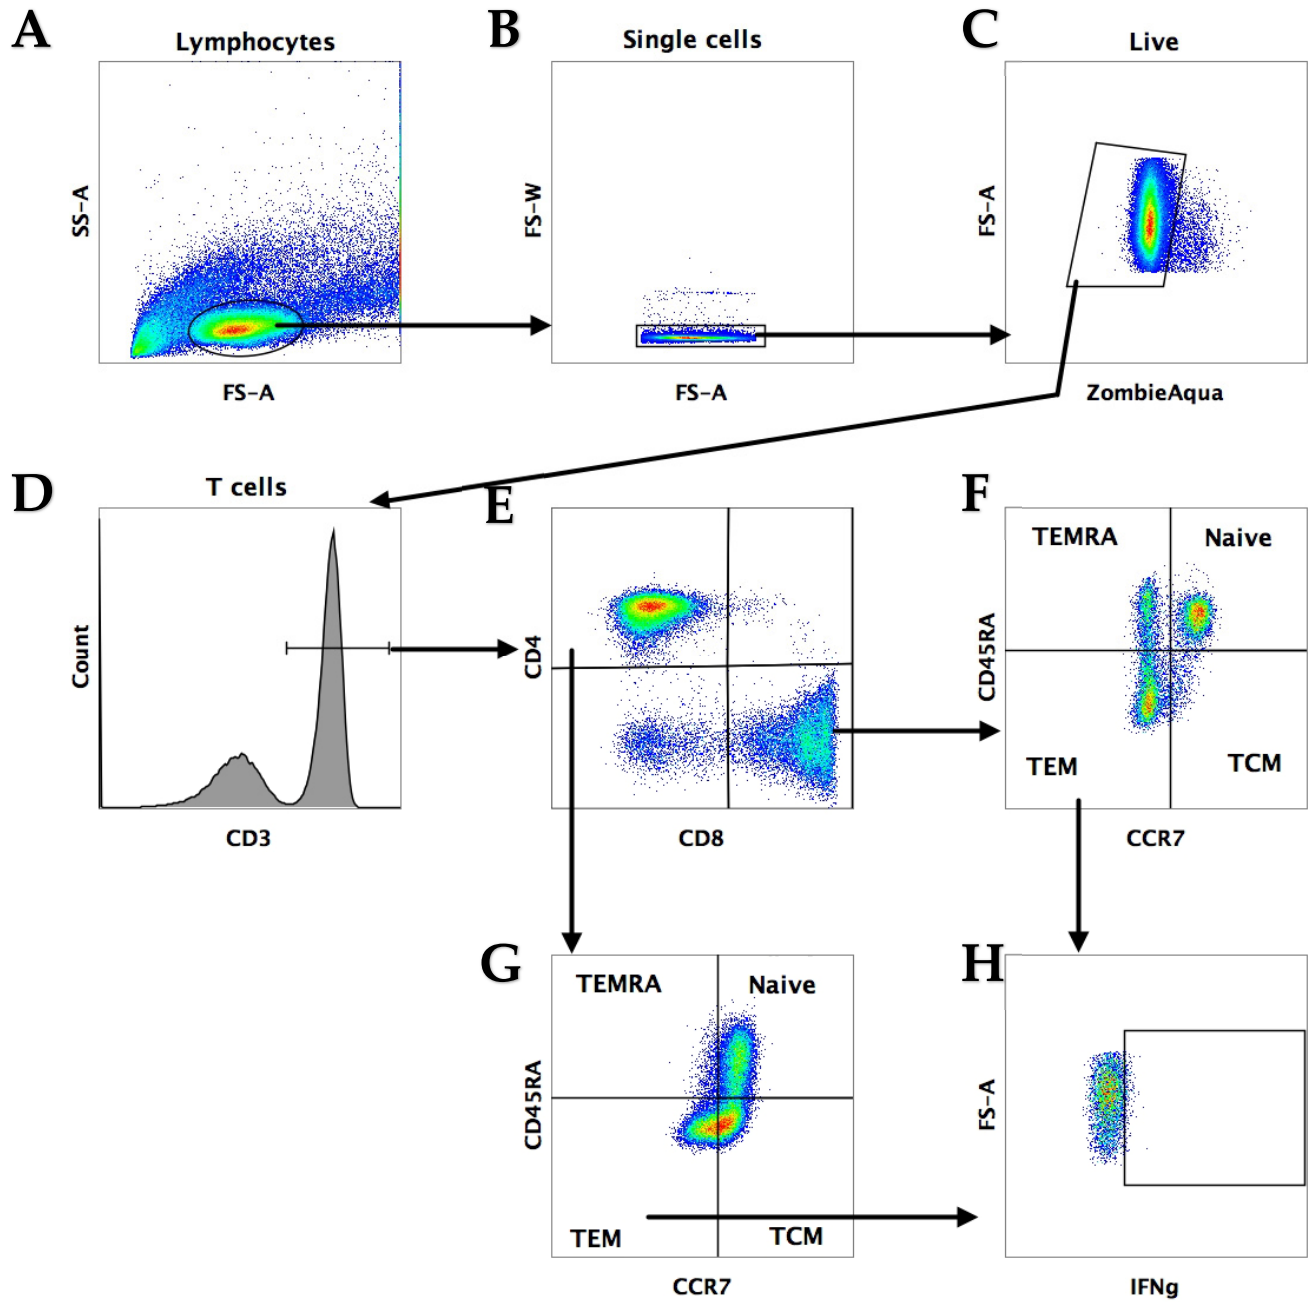

**Figure S1.** Gating strategy for the IFN $\gamma$  ICS assay. Total lymphocytes were gated based on their side-scatter and forward-scatter (dot plot **A**); dot plot **B** – doublets were excluded from the analysis using FS-area (FS-A) and FS-height (FS-W) and ZombieAqua-positive dead cells were eliminated from lymphocytes (dot plot **C**). Next, based on CD3<sup>+</sup> expression (dot plot **D**) the total T cell subset was identified. T cells were further analyzed by expression of CD8<sup>+</sup> and CD4<sup>+</sup> (dot plot **E**) for identification of total CD3<sup>+</sup>CD8<sup>+</sup> cytotoxic T cells and CD3<sup>+</sup>CD4<sup>+</sup> T helper cells. Dot plots **F** and **G** – within total CD3<sup>+</sup>CD8<sup>+</sup> and CD3<sup>+</sup>CD4<sup>+</sup> cells we purified “naïve” (CD45RA<sup>+</sup>CCR7<sup>+</sup>), central memory (CD45RA<sup>+</sup>CCR7<sup>+</sup>), effector memory (CD45RA<sup>+</sup>CCR7<sup>-</sup>) cells and TEMRA (CD45RA<sup>+</sup>CCR7<sup>-</sup>) cells. Finally, within CD45RA<sup>+</sup>CCR7<sup>-</sup> TEM cytotoxic T cells and Th cells IFN $\gamma$ -expressing cells were identified (dot plot **H** shown as an example).

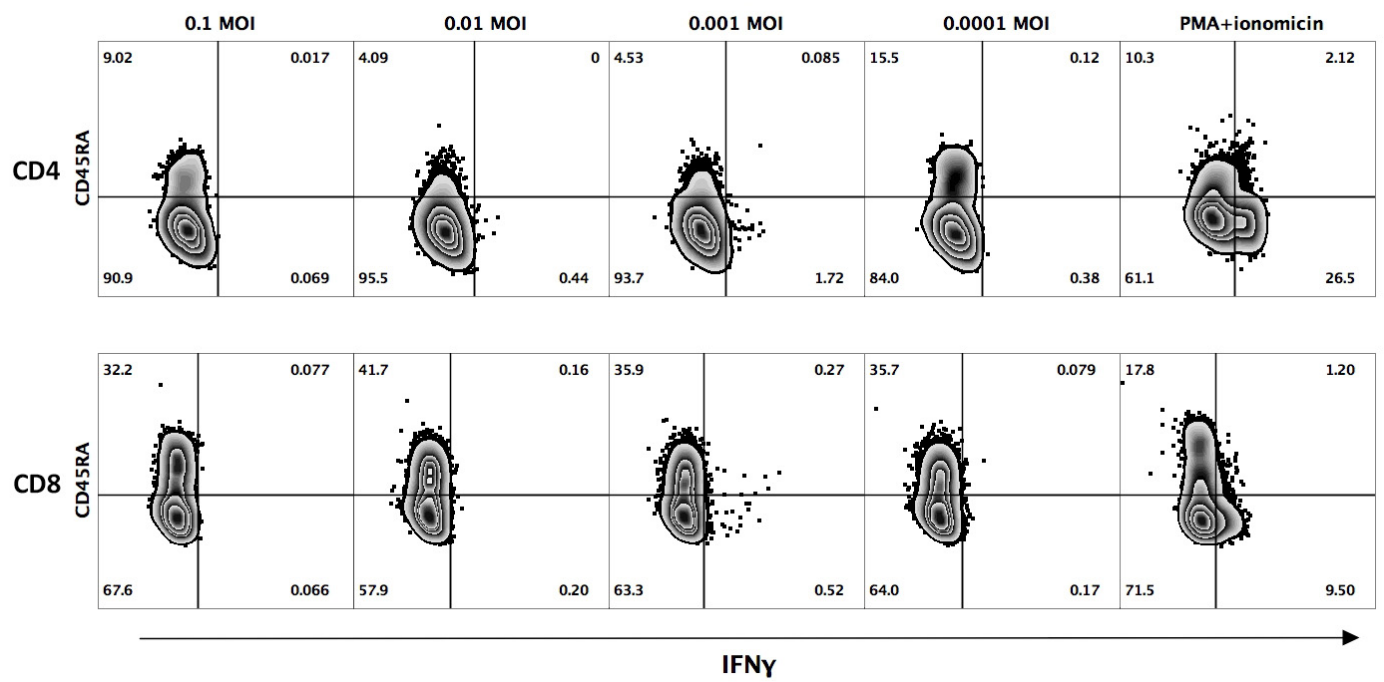

**Figure S2.** IFN $\gamma$  production by CD4 $^{+}$  (upper panel) and CD8 $^{+}$  (lower panel) memory T cells after stimulation with various doses of live SARS-CoV-2. Fresh PBMCs isolated from COVID-19 recovered patient were stimulated in vitro with different concentrations of SARS-CoV-2. IFN $\gamma$  production by CD4 $^{+}$  and CD8 $^{+}$  T cells was assessed by flow cytometry.

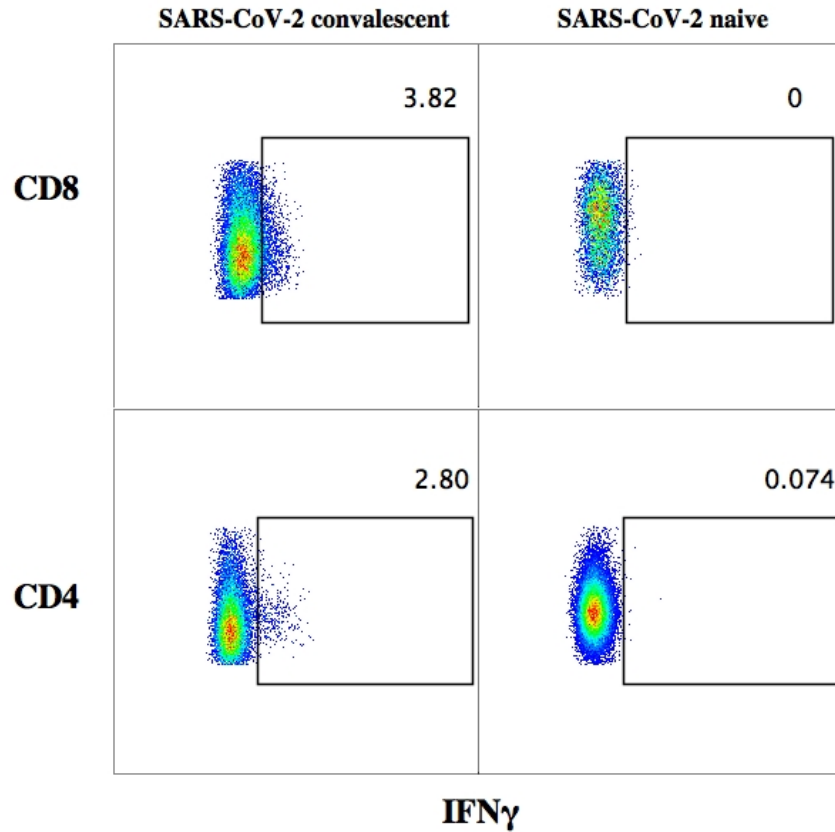

**Figure S3.** Representative gates for IFN $\gamma$  production by CD8 $^{+}$  (upper panel) and CD4 $^{+}$  (lower panel) memory T cells after in vitro stimulation of PBMCs isolated from a COVID-19-recovered subject one month after the disease onset (left panel) or a naïve subject (right panel) with live SARS-CoV-2.

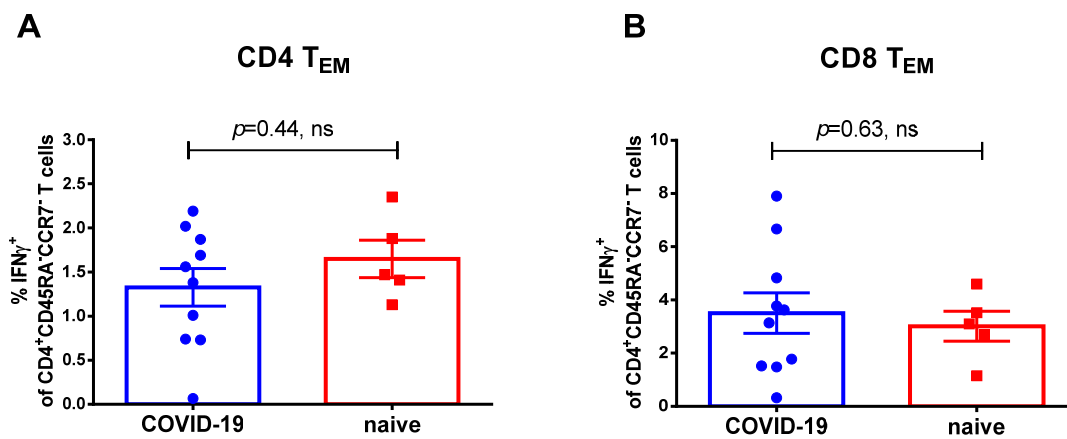

**Figure S4.** Influenza virus-specific CD4 $^{+}$  (A) and CD8 $^{+}$  (B) memory T cells in subjects recovered from SARS-CoV-2 infection and in COVID-19-naïve participants. Proportions of IFN $\gamma$ -secreting cells among corresponding Tem cell subsets were measured by ICS assay. The bars indicate the mean values and the error bars show standard error mean values. Data were analyzed by two-sided Mann-Whitney U test. ns: not significant.
